# Supplementary material for: Intratumoral heterogeneity of endogenous tumor cell invasive behavior in human glioblastoma
Source: PubMed Central journal article supplement (PMC6301947; doi:10.1038/s41598-018-36280-9), 2018-12-20
Supplement: 41598_2018_36280_MOESM1_ESM.pdf [file 41598_2018_36280_MOESM1_ESM.pdf]

# Supplementary Information

---

## Intratumoral heterogeneity of endogenous tumor cell invasive behavior in human glioblastoma

Jonathon J. Parker<sup>1</sup>, Peter Canoll<sup>2</sup>, Lee Niswander<sup>3</sup>, BK Kleinschmidt-DeMasters<sup>4,5</sup>, Kara Foshay<sup>6,\*</sup>, and Allen Waziri<sup>6</sup>

<sup>1</sup>Stanford University School of Medicine, Department of Neurosurgery, Stanford, CA

<sup>2</sup>Columbia University College of Physicians and Surgeons, Department of Pathology and Cell Biology, New York, NY

<sup>3</sup>University of Colorado, Department of Molecular, Cellular & Developmental Biology, Boulder, CO

<sup>4</sup>University of Colorado School of Medicine, Department of Pathology, Anschutz Medical Campus, Aurora, CO

<sup>5</sup>University of Colorado School of Medicine, Department of Neurosurgery, Anschutz Medical Campus, Aurora, CO

<sup>6</sup>Inova Neuroscience and Spine Institute, Inova Health Systems, Falls Church, VA.

\*corresponding author: [kara.foshay@inova.org](mailto:kara.foshay@inova.org)

### **Supplementary Information Includes:**

Supplemental Figure 1

Supplemental Figure 2

Supplemental Table 1

*n = 7 slices from separate tumors*

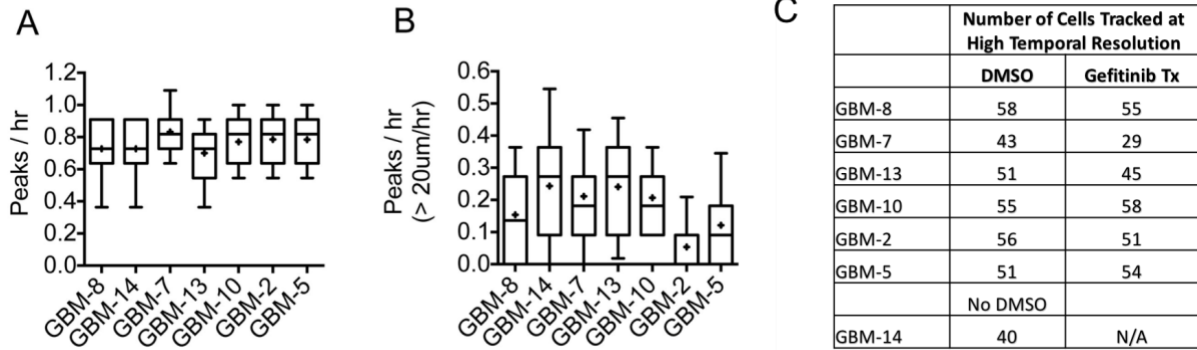

**Supplemental Figure 1.** Individual slice cell movement analysis uncovers significant interpatient variation in high-speed peak (“burst”) frequency. A subset of tumor cells (40 to 58, mean 51) were tracked in a group of GBM slice cultures ( $n=7$ ) with high-temporal resolution (11 minutes). A. The mean total peaks per cell each hour were normally distributed and minimally variable across the tumor cell populations (ANOVA,  $p = 0.009$ ). B. The mean high-speed ( $>20 \mu\text{m/hr}$ ) peaks per cell each hour varied significantly across the tumor cell populations studied (Kruskal-Wallis ANOVA,  $p < 0.001$ ) ranging from 0.05 to 0.24 peaks per hour. C. The number of cells tracked at high temporal resolution for each slice is represented in tabular form for the current study.

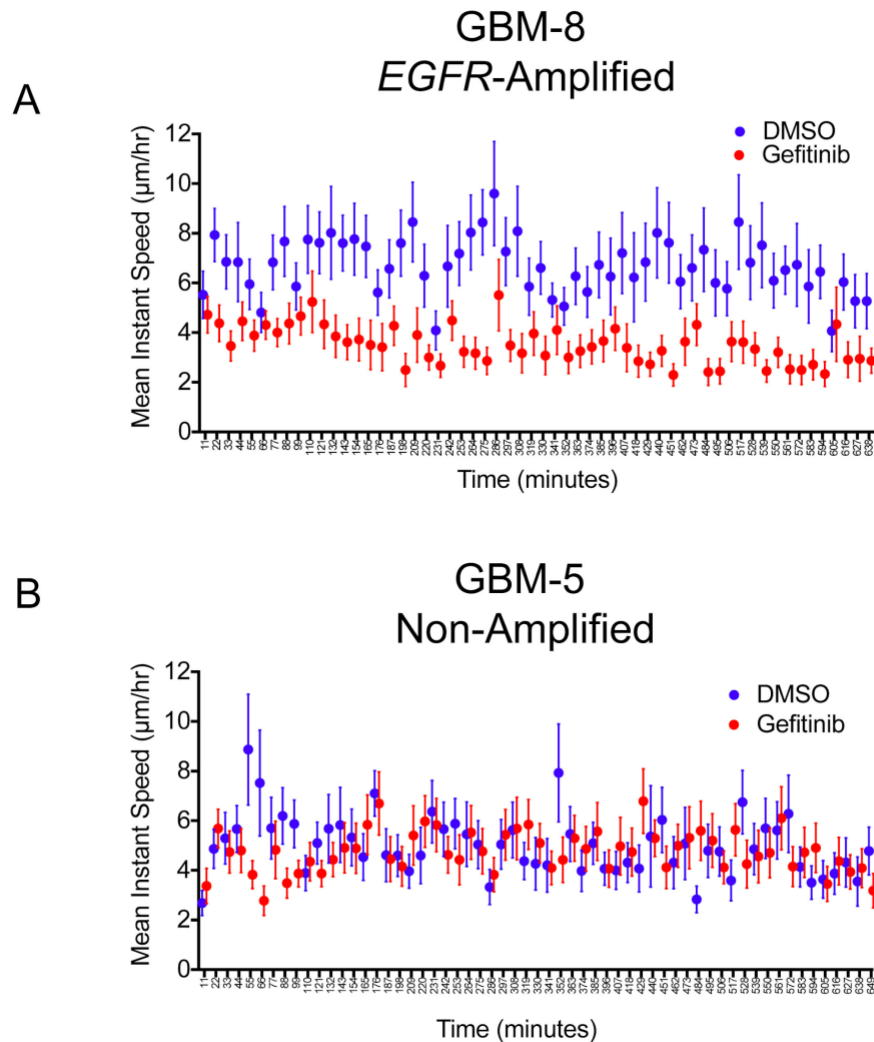

**Supplemental Figure 2.** EGFR inhibition has an immediate effect on cell migration speed in receptor amplified tumors. Imaging and cell tracking (every 11 minutes) began 15 minutes after addition of media containing 10  $\mu\text{M}$  gefitinib. Approximately 50 cells were tracked in each condition. A. Significant separation existed between the instantaneous speed of the cell population in control (DMSO) versus gefitinib treatment periods in an *EGFR*-amplified tumor (GBM-8) (2-way ANOVA,  $p < 0.0001$ ), and was maintained over 11 hours, with no time dependent effects (2-way ANOVA,  $p = 0.80$ ). B. An *EGFR* non-amplified tumor (GBM-5) shows no response to gefitinib treatment (2-way ANOVA,  $p = 0.18$ ) and no time dependent effects (2-way ANOVA,  $p = 0.62$ ). Error bars represent standard error of the mean (SEM).

| <b>Patient ID</b> | <b>Age</b> | <b>Sex</b> | <b>Pathologic Diagnosis</b>       | <b>Anatomical Location</b> | <b>EGFR Amplification (FISH)</b> | <b>IDH1 mutated (IHC)</b> |
|-------------------|------------|------------|-----------------------------------|----------------------------|----------------------------------|---------------------------|
| GBM-13            | 55         | M          | Glioblastoma                      | Left Temporal              | <b>Y</b>                         | <b>N</b>                  |
| GBM-7             | 42         | M          | Glioblastoma                      | Right Frontal-Parietal     | <b>Y</b>                         | <b>N</b>                  |
| GBM-8             | 54         | M          | Glioblastoma (Recurrent)          | Left Frontal               | <b>Y</b>                         | <b>N</b>                  |
| GBM-14            | 53         | M          | Glioblastoma                      | Left Temporal              | <b>Y</b>                         | <b>N</b>                  |
| GBM-2             | 47         | M          | Glioblastoma (small cell variant) | Left Temporal              | <b>N</b>                         | <b>N</b>                  |
| GBM-5             | 58         | M          | Glioblastoma                      | Right Temporal             | <b>N</b>                         | <b>N</b>                  |
| GBM-10            | 58         | M          | Glioblastoma                      | Right Temporal             | <b>N</b>                         | <b>N</b>                  |

**Supplemental Table 1.** Patient demographics and tumor genetics represented in the current study cohort.
